# Supplementary material
Source: PubMed Central journal article supplement (PMC4415233)
Supplement: 13321_2015_59_MOESM1_ESM.pdf [file 13321_2015_59_MOESM1_ESM.pdf]

# Additional Listings File

Supplementary information to the article

## **Improving ligand-binding site prediction accuracy by classification of inner pocket points using local features**

Radoslav Krivák and David Hoksza

### **1. Complete list of features**

Complete list of properties of feature vectors used to represent inner pocket points.

| Feature name       | description                                                               |
|--------------------|---------------------------------------------------------------------------|
| hydrophobic        | binary attribute, 1 for hydrophobic residues                              |
| hydrophilic        | binary attribute, 1 for hydrophilic residues                              |
| hydrophatyIndex    | side-chain hydrophaty index with values in range $(-4.5, 4.5)$ [1]        |
| aliphatic          | binary attribute, 1 for aliphatic residues                                |
| aromatic           | binary attribute, 1 for aromatic residues                                 |
| sulfur             | binary attribute, 1 for residues containing sulfur                        |
| hydroxyl           | binary attribute, 1 for hydroxyl group containing residues                |
| basic              | binary attribute, 1 for basic residues                                    |
| acidic             | binary attribute, 1 for acidic residues                                   |
| amide              | binary attribute, 1 for amide group containing residues                   |
| posCharge          | binary attribute, 1 for positively charged residues                       |
| negCharge          | binary attribute, 1 for negatively charged residues                       |
| hBondDonor         | binary attribute, 1 for H-bond donor containing residues                  |
| hBondAcceptor      | binary attribute, 1 for H-bond acceptor containing residues               |
| hBondDonorAcceptor | binary attribute, 1 for residues that have H-bond donor AND acceptor      |
| polar              | binary attribute, 1 for polar residues                                    |
| ionizable          | binary attribute, 1 for ionizable residues                                |
|                    |                                                                           |
| atoms              | absolute number of protein exposed atoms (within 8 Å radius of the point) |
| atomDensity        | number of protein exposed atoms weighted by distance                      |
| atomC              | number of carbon atoms                                                    |
| atomO              | number of oxygen atoms                                                    |
| atomN              | number of nitrogen atoms                                                  |
| hDonorAtoms        | number of H-bond donor atoms                                              |

|                   |                                                                                                                                                |
|-------------------|------------------------------------------------------------------------------------------------------------------------------------------------|
| hAcceptorAtoms    | number of H-bond acceptor atoms                                                                                                                |
| vsAromatic        | VolSite atomic level features [2]                                                                                                              |
| vsCation          | ~                                                                                                                                              |
| vsAnion           | ~                                                                                                                                              |
| vsHydrophobic     | ~                                                                                                                                              |
| vsAcceptor        | ~                                                                                                                                              |
| vsDonor           | ~                                                                                                                                              |
| ap5sasaValidids   | Ligand binding propensity for biologically valid ligands [3]                                                                                   |
| ap5sasaInvalidids | Ligand binding propensity for biologically invalid ligands [3]                                                                                 |
| protrusion        | Protein surface protrusion inspired by [4] calculated simply as number of all protein atoms (not just exposed) within 10 Å radius of the point |
| bfactor           | B-factor number of the atom from pdb file                                                                                                      |

#### References:

1. Kyte, J., Doolittle, R.F.: A simple method for displaying the hydropathic character of a protein. *Journal of Molecular Biology* 157(1), 105–132 (1982).
2. Desaphy, J., Azdimousa, K., Kellenberger, E., Rognan, D.: Comparison and druggability prediction of protein-ligand binding sites from pharmacophore-annotated cavity shapes. *Journal of chemical information and modeling* 52(8), 2287–2299 (2012).
3. Khazanov, N.A., Carlson, H.A.: Exploring the composition of protein-ligand binding sites on a large scale. *PLoS computational biology* 9(11), 1003321 (2013).
4. Alessandro Pintar, Oliviero Carugo, and Sándor Pongor: CX, an algorithm that identifies protruding atoms in proteins. *Bioinformatics* (2002) 18 (7): 980-984

## 2. ConCavity no-conservation proteins

Lists of proteins (by dataset) for which ConCavity was run with the conservation mode switched off. Those are the proteins for which pre-computed sequence conservation files were not available or ConCavity failed to produce any results in conservation mode even if they were.

|                 |                                                                                                                                                                                                                                                                                                       |
|-----------------|-------------------------------------------------------------------------------------------------------------------------------------------------------------------------------------------------------------------------------------------------------------------------------------------------------|
| CHEN11 - 16/251 | a.003.001.004_1m6zb.pdb<br>a.138.001.003_1qdbb.pdb<br>b.042.002.001_2zqnb.pdb<br>b.085.007.002_2g46a.pdb<br>b.089.001.001_1iiya.pdb<br>c.001.013.001_1p7tb.pdb<br>c.002.001.003_2g82c.pdb<br>c.025.001.004_1ja1b.pdb<br>c.062.001.001_3bqmb.pdb<br>c.065.001.001_2blnb.pdb<br>c.087.001.001_1m5rb.pdb |
|-----------------|-------------------------------------------------------------------------------------------------------------------------------------------------------------------------------------------------------------------------------------------------------------------------------------------------------|

|                |                                                                                                                                                                                                                                                                        |
|----------------|------------------------------------------------------------------------------------------------------------------------------------------------------------------------------------------------------------------------------------------------------------------------|
|                | c.087.001.010_2c1xa.pdb<br>d.001.001.004_1bvic.pdb<br>d.019.001.001_2akrc.pdb<br>d.110.006.001_1p0zg.pdb<br>e.003.001.001_2hdub.pdb                                                                                                                                    |
| ASTEX - 2/85   | 1hnn.pdb<br>1oyt.pdb                                                                                                                                                                                                                                                   |
| UB48 - 5/96    | 1dwd.pdb<br>1hxf.pdb<br>1ida.pdb<br>1pso.pdb<br>3gch.pdb                                                                                                                                                                                                               |
| DT198 - 19/198 | 1cea_A.pdb<br>1fj8_A.pdb<br>1lxf_C.pdb<br>1pk2_A.pdb<br>1q8y_B.pdb<br>1y4l_B.pdb<br>2cft_A.pdb<br>2xh1_A.pdb<br>2xhd_A.pdb<br>2zt7_A.pdb<br>3d90_A.pdb<br>3gmz_A.pdb<br>3h6t_A.pdb<br>3ii0_A.pdb<br>3inj_A.pdb<br>3iyt_A.pdb<br>3k4v_A.pdb<br>3kvv_A.pdb<br>3l6b_A.pdb |
| MP210 - 4/210  | 1ac0.pdb<br>1b6n.pdb<br>2er0.pdb<br>3gch.pdb                                                                                                                                                                                                                           |
